# Supplementary material for: Mutational re-modeling of di-aspartyl intramembrane proteases: uncoupling physiologically-relevant activities from those associated with Alzheimer’s disease
Source: PubMed Central journal article supplement (PMC5669866; doi:10.18632/oncotarget.18299), 2017-05-30
Supplement: oncotarget-08-82006-s001.pdf [file oncotarget-08-82006-s001.pdf]

# Mutational re-modeling of di-aspartyl intramembrane proteases: uncoupling physiologically-relevant activities from those associated with Alzheimer's disease

## SUPPLEMENTARY MATERIALS

### Conservative Domain I

(first Asp, PSEN1 D257, hIMP1 D219)

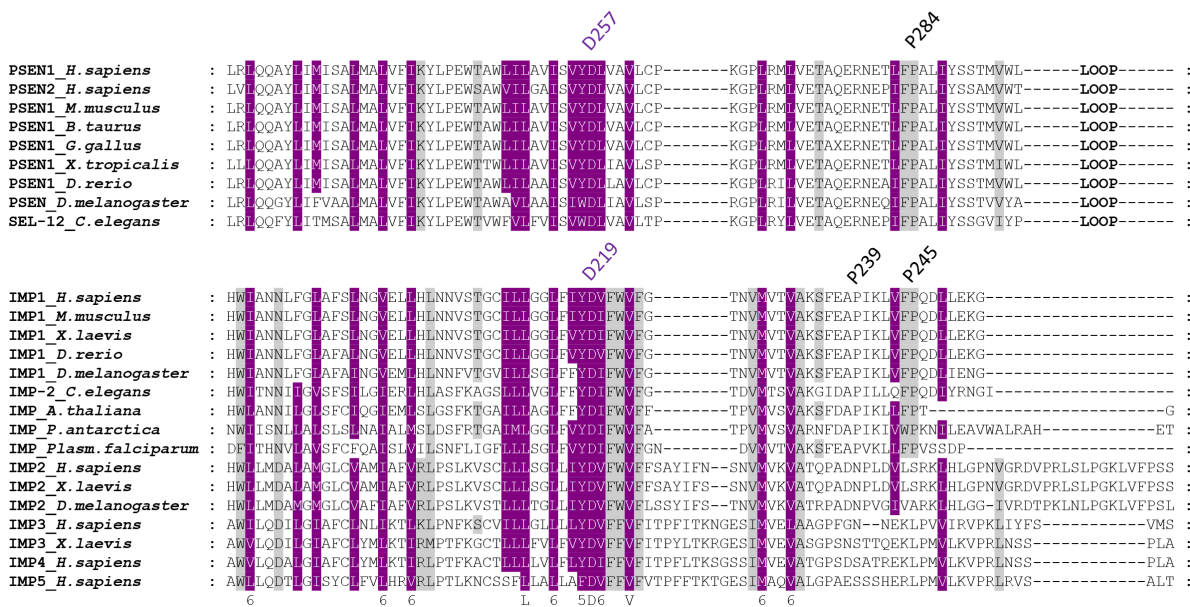

### Conservative Domains II

(second Asp, PSEN1 D382, hIMP1 D265)

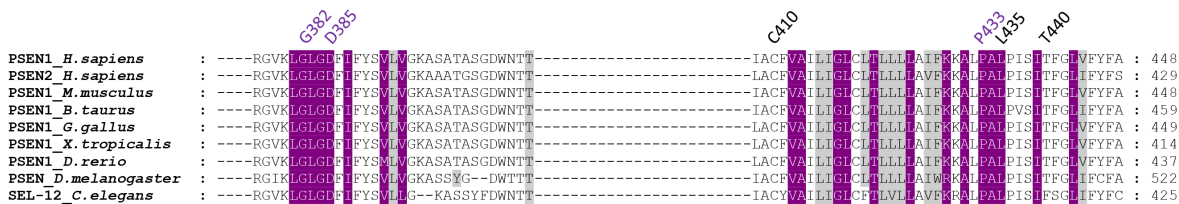

### Conservative Domains III

(PAL-motif, PSEN1 P433-435, hIMP1 P317-319)

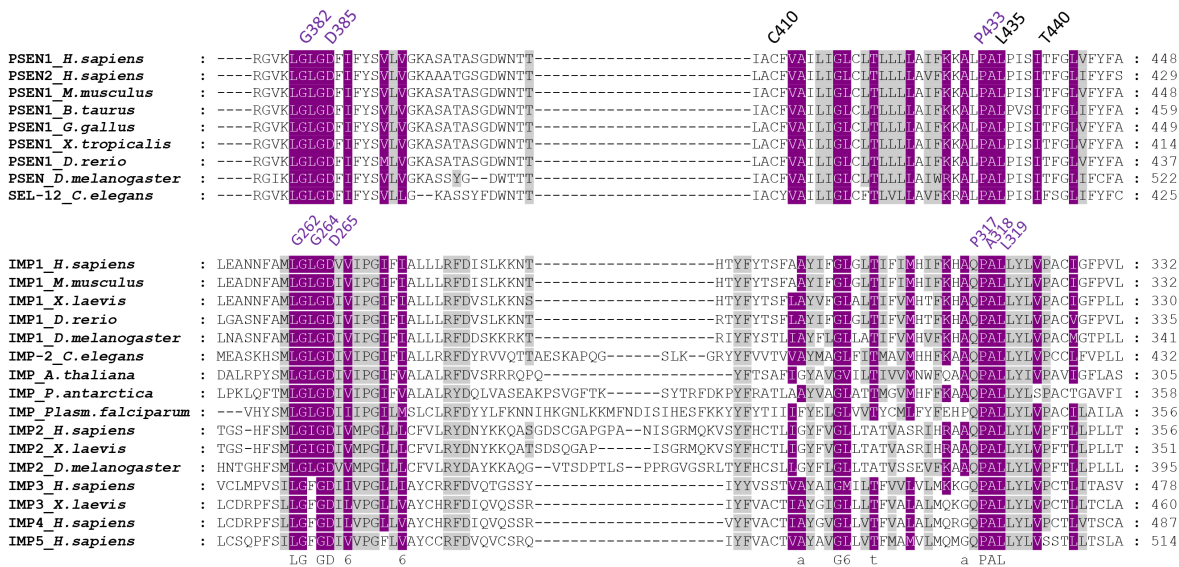

Supplementary Figure 1: Multiple sequence alignment of PSENs and distant presenilin homologous proteins (IMP 1-5, termed also SPP, SPPLs or PSH).

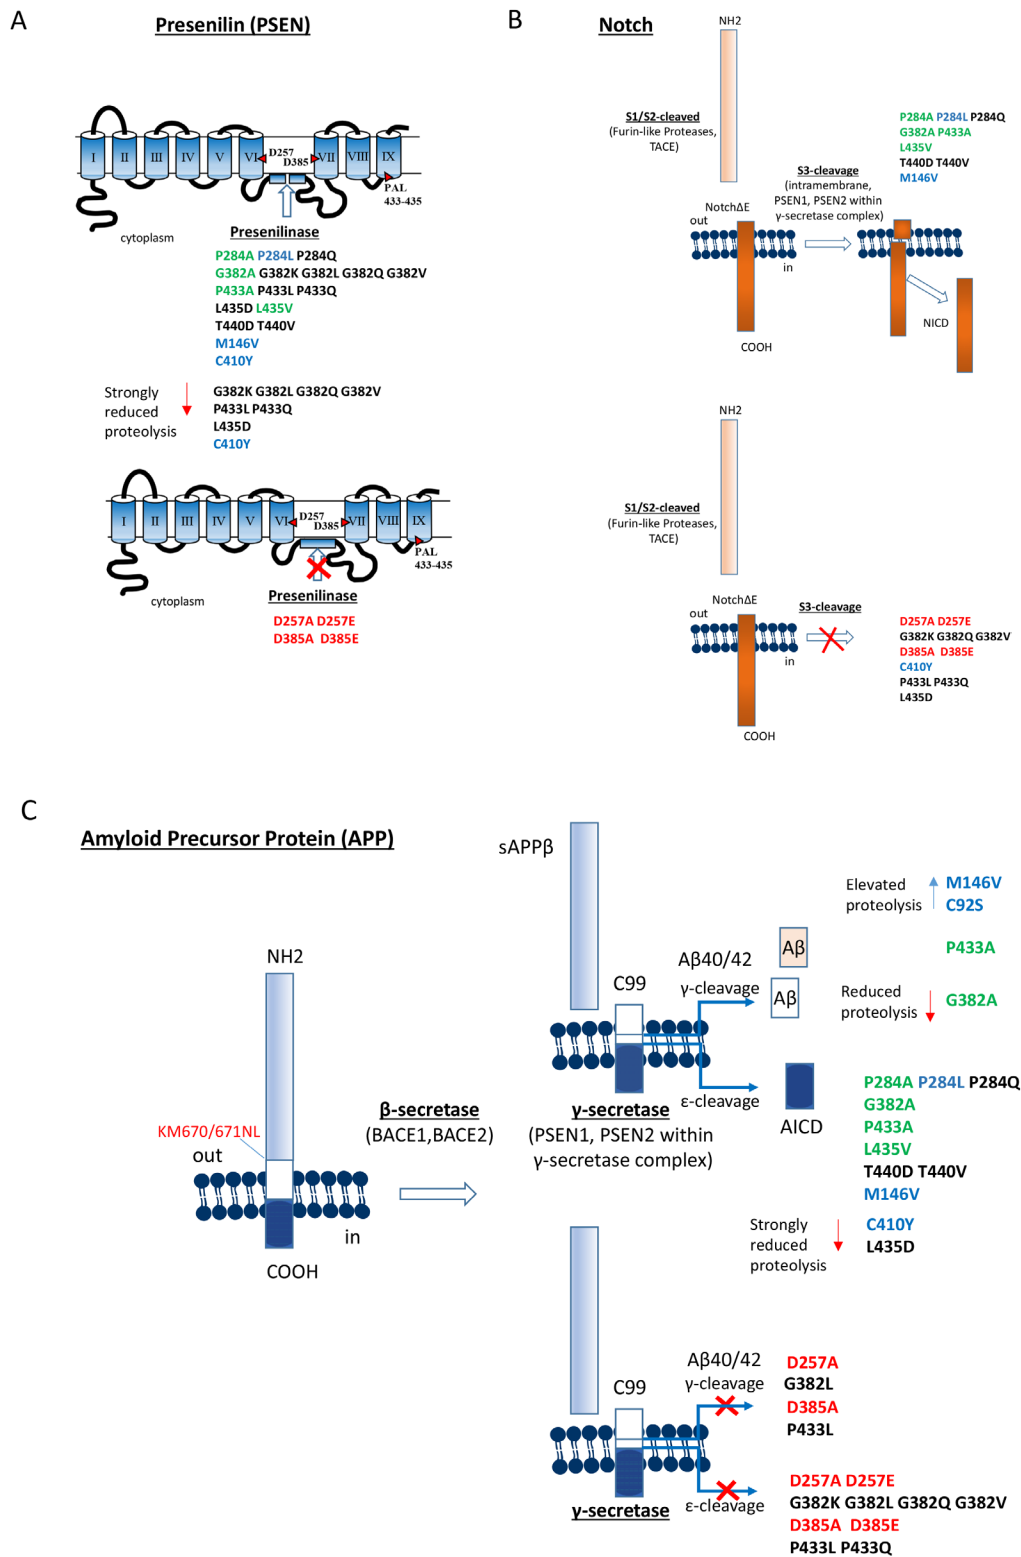

**Supplementary Figure 2: (A, B).** Schematic representation of mutations in Presenilin 1 affecting proteolytic activities of Presenilinase (A) and Notch S3 cleavage (B). (C). Schematic representation of mutations in Presenilin 1 affecting proteolytic activities of APP  $\gamma$ -secretase cleavage. APP695 isoform that bears the Swedish mutation for AD (KM670/671NL) was used in the experiments. In this and other Figures, mutations in super-conserved aspartates are indicated in red, mutations with similar amino acid changes, which do not alter the physicochemical properties of the site, are in green and AD mutations are in blue.

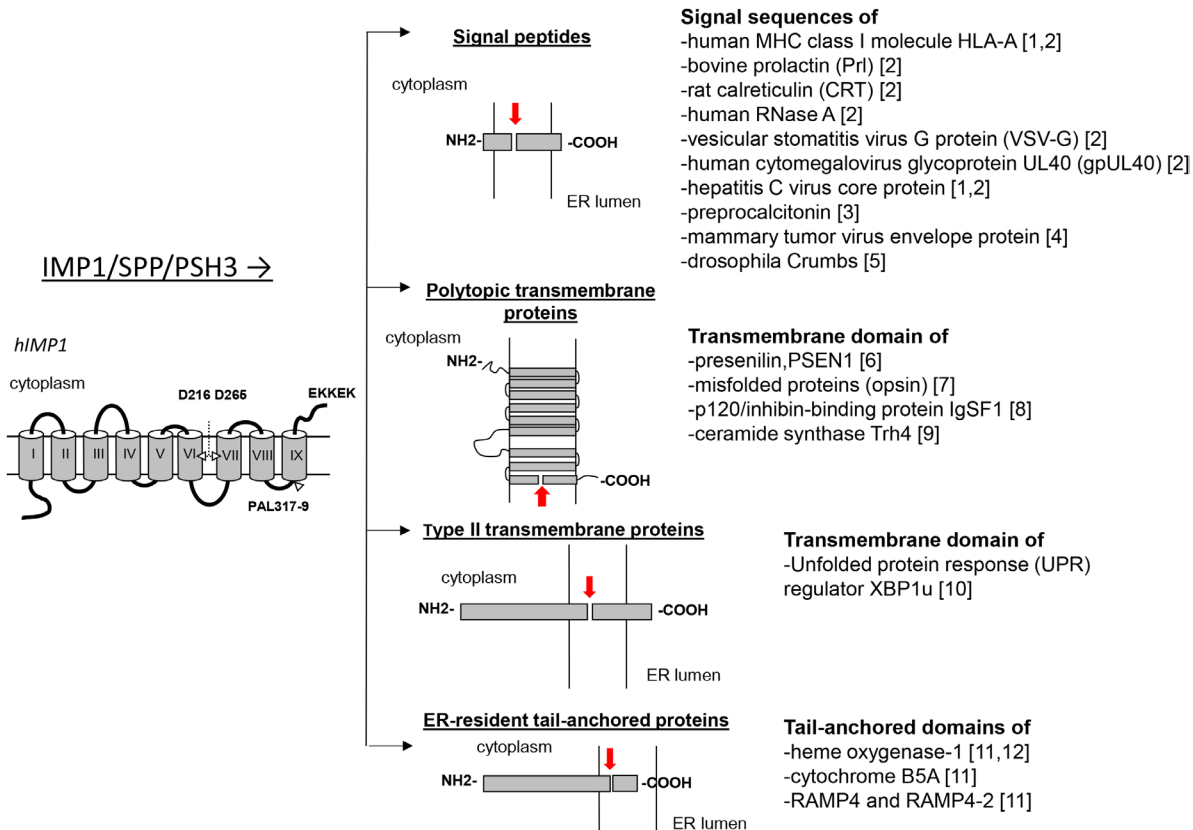

Supplementary Figure 3: IMP1/SPP substrates.

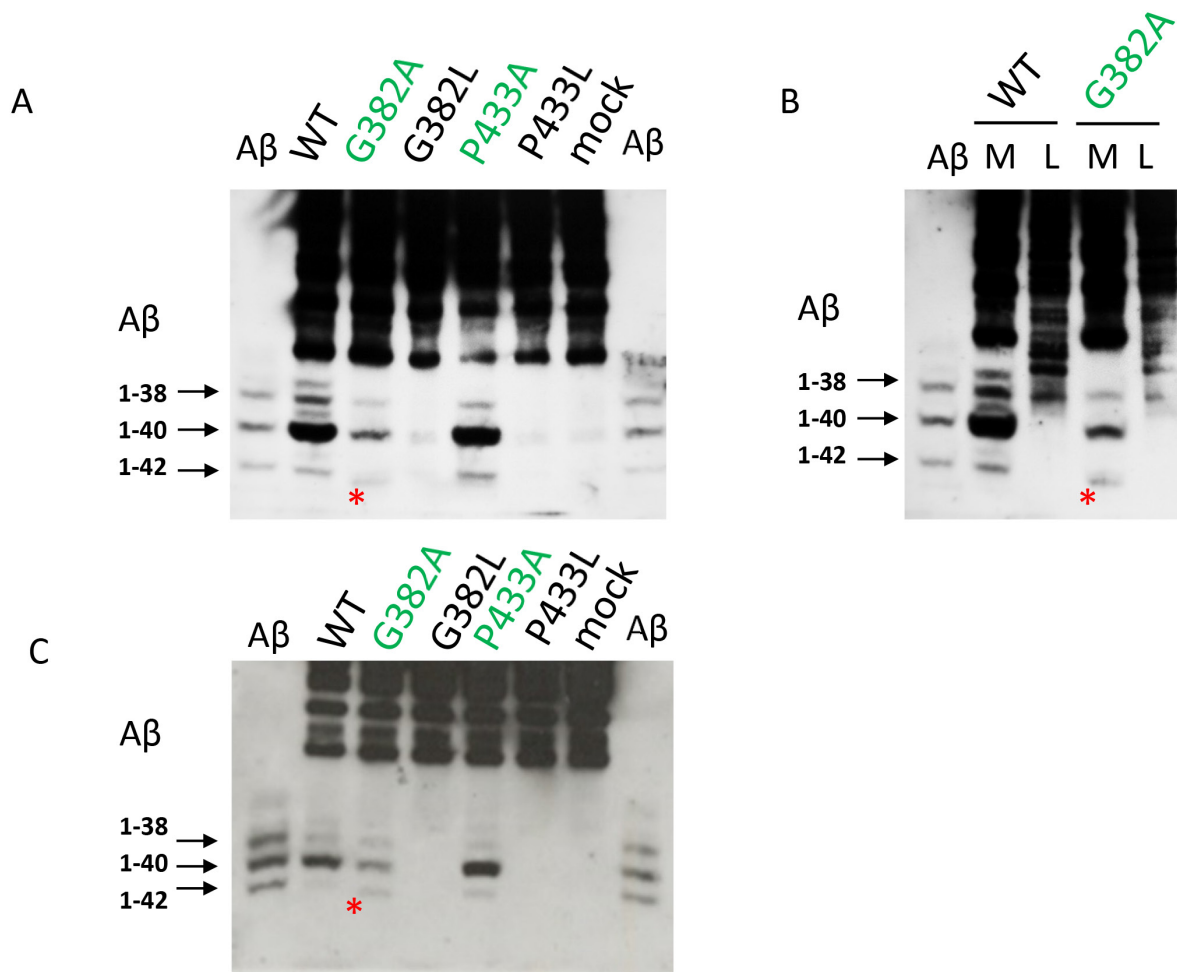

**Supplementary Figure 4: Detection of secreted Aβ peptides in *PSEN1*<sup>-/-</sup>/*PSEN2*<sup>-/-</sup> MEF cells co-transfected with wild type or mutant PSEN1 and APP695ΔNL.** Aβ peptides were detected in cell medium (A, B (M lanes) and C), but not in cell lysates (B - L lanes). (A, B) - immunoblots described in details in Figure 5 of the main text are shown with a higher exposure. Independent experiment (C) shows a specific Aβ peptide product (\*), produced by the G382A mutant, which differs from Aβ42.

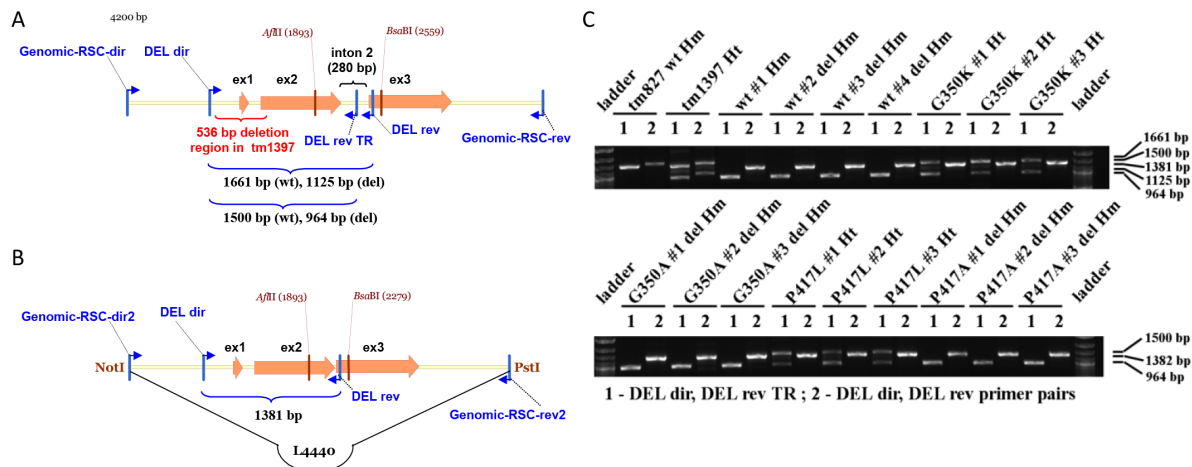

**Supplementary Figure 5: Construct used for the rescue experiments in *C. elegans* and genotyping strategy.** (A) Schematic representation of *Ce-imp-2* genomic region in wild type and tm1397 strains, bearing 536 bp deletion at the beginning of the gene. DEL dir, DEL rev and DEL rev TR primers were used for genotyping. (B) Plasmid construction used in *C. elegans* rescue experiments. Genomic fragment of *imp-2* gene was cloned into L4440 vector and AflII-BsaBI genomic fragment was substituted with CDS fragment skipping intron 2. (C) Genotyping of worms. Two pairs of primers (1-Del dir/Del rev TR and 2- DEL dir/DEL rev) identify correspondingly: 1) 1500 bp and 1661 bp fragments in N2 wild type strain or *Ce-imp-1* knockout strain tm827; 2) 1500 bp, 964 bp and 1661 bp, 1125 bp fragments in *Ce-imp-2<sup>+/+</sup>* (Ht) worms of tm1397 strain ; 3) 964 bp and 1381 bp fragments in *Ce-imp-2<sup>-/-</sup>* (Hm) worm strains rescued with *Ce-imp-2* wild type (wt), G350A, P417A transgenes; 4) 1500 bp, 964 bp and 1381 bp fragments in *Ce-imp-2<sup>+/+</sup>* (Ht) worm strains with *Ce-imp-2* G350K and P417L transgenes. DEL dir/DEL rev 1125 bp genomic fragment amplification was inhibited by predominant amplification of transgenic 1381 bp fragment in all transgenic strains. Wt #1-4, G350K #1-3, G350A #1-3, P417L #1-3, P417A #1-3 are independent transgenic strains generated in the course of experiments.

## SUPPLEMENTARY FIGURE REFERENCES

1. Weihofen A, Binns K, Lemberg MK, Ashman K, Martoglio B. Identification of signal peptide peptidase, a presenilin-type aspartic protease. *Science*. 2002; 296:2215–18.
2. Lemberg MK, Martoglio B. Requirements for signal peptide peptidase-catalyzed intramembrane proteolysis. *Mol Cell*. 2002; 10:735–44.
3. El Hage F, Stroobant V, Vergnon I, Baurain JF, Echchakir H, Lazar V, Chouaib S, Coulie PG, Mami-Chouaib F. Preprocalcitonin signal peptide generates a cytotoxic T lymphocyte-defined tumor epitope processed by a proteasome-independent pathway. *Proc Natl Acad Sci USA*. 2008; 105:10119–24.
4. Dultz E, Hildenbeutel M, Martoglio B, Hochman J, Dobberstein B, Kapp K. The signal peptide of the mouse mammary tumor virus Rem protein is released from the endoplasmic reticulum membrane and accumulates in nucleoli. *J Biol Chem*. 2008; 283:9966–76.
5. Kilic A, Klose S, Dobberstein B, Knust E, Kapp K. The *Drosophila* Crumbs signal peptide is unusually long and is a substrate for signal peptide peptidase. *Eur J Cell Biol*. 2010; 89:449–61.
6. Moliaka YK, Grigorenko A, Madera D, Rogaev EI. Impas 1 possesses endoproteolytic activity against multipass membrane protein substrate cleaving the presenilin 1 holoprotein. *FEBS Lett*. 2004; 557:185–92.
7. Crawshaw SG, Martoglio B, Meacock SL, High S. A misassembled transmembrane domain of a polytopic protein associates with signal peptide peptidase. *Biochem J*. 2004; 384:9–17.
8. Robakis T, Bak B, Lin SH, Bernard DJ, Scheiffele P. An internal signal sequence directs intramembrane proteolysis of a cellular immunoglobulin domain protein. *J Biol Chem*. 2008; 283:36369–76.
9. Oliveira CC, Querido B, Sluijter M, de Groot AF, van der Zee R, Rabelink MJ, Hoeben RC, Ossendorp F, van der Burg SH, van Hall T. New role of signal peptide peptidase to liberate C-terminal peptides for MHC class I presentation. *J Immunol*. 2013; 191:4020–28.
10. Chen CY, Malchus NS, Hehn B, Stelzer W, Avci D, Langosch D, Lemberg MK. Signal peptide peptidase functions in ERAD to cleave the unfolded protein response regulator XBP1u. *EMBO J*. 2014; 33:2492–506.
11. Boname JM, Bloor S, Wandel MP, Nathan JA, Antrobus R, Dingwell KS, Thurston TL, Smith DL, Smith JC, Randow F, Lehner PJ. Cleavage by signal peptide peptidase is required for the degradation of selected tail-anchored proteins. *J Cell Biol*. 2014; 205:847–62.
12. Hsu FF, Yeh CT, Sun YJ, Chiang MT, Lan WM, Li FA, Lee WH, Chau LY. Signal peptide peptidase-mediated nuclear localization of heme oxygenase-1 promotes cancer cell proliferation and invasion independent of its enzymatic activity. *Oncogene*. 2015; 34:2360–70.

## SUPPLEMENTARY TABLES

**Supplementary Table 1: List of mutated PSEN1 constructs.** Amino acid changes with similar physicochemical properties are in green boxes [1, 2]

| Construct<br>PSEN1 | WT<br>amino acid       | Mutated<br>amino acid | Site position                                                                                | Known AD<br>mutations in<br>this position,<br>Alzforum.org | dbSNP 146 &<br>COSMIC variants                                                    |
|--------------------|------------------------|-----------------------|----------------------------------------------------------------------------------------------|------------------------------------------------------------|-----------------------------------------------------------------------------------|
| M146V              | hydrophobic            | hydrophobic           | AD mutation                                                                                  | <b>M146V</b> , M146I,<br>M146L                             | M146L, M146V<br><a href="#">rs63750306</a><br>M146I<br><a href="#">rs63750391</a> |
| D257A              | <b>hydrophilic</b>     | hydrophobic           | First conserved aspartate                                                                    | no                                                         | D257D<br><a href="#">rs200481721</a>                                              |
| D257E              | <b>hydrophilic</b>     | <b>hydrophilic</b>    | First conserved aspartate                                                                    |                                                            | D257N<br><a href="#">COSM698729</a>                                               |
| P284A              | special, imino<br>acid | hydrophobic           | Partially conserved proline<br>(first <b>P</b> AL-motif in the hydrophobic part of the loop) |                                                            | P284S<br><a href="#">rs63750324</a>                                               |
| P284L              | special, imino<br>acid | hydrophobic           | Partially conserved<br>(first <b>P</b> AL-motif in the hydrophobic part of the loop)         | P284L, P284S                                               | P284L<br><a href="#">rs63750863</a>                                               |
| P284Q              | special, imino<br>acid | <b>hydrophilic</b>    | Partially conserved<br>(first <b>P</b> AL-motif in the hydrophobic part of the loop)         |                                                            |                                                                                   |
| G382A              | special                | hydrophobic           | First conserved glycine within<br><b>GLGD</b> -motif of the second<br>conserved aspartate    |                                                            |                                                                                   |
| G382K              | special                | <b>hydrophilic</b>    | First conserved glycine within<br><b>GLGD</b> -motif of the second<br>conserved aspartate    |                                                            |                                                                                   |
| G382L              | special                | hydrophobic           | First conserved glycine within<br><b>GLGD</b> -motif of the second<br>conserved aspartate    | no                                                         | no                                                                                |
| G382Q              | special                | <b>hydrophilic</b>    | First conserved glycine within<br><b>GLGD</b> -motif of the second<br>conserved aspartate    |                                                            |                                                                                   |
| G382V              | special                | hydrophobic           | First conserved glycine within<br><b>GLGD</b> -motif of the second<br>conserved aspartate    |                                                            |                                                                                   |
| D385A              | <b>hydrophilic</b>     | hydrophobic           | Second conserved aspartate                                                                   | no                                                         | no                                                                                |
| D385E              | <b>hydrophilic</b>     | <b>hydrophilic</b>    | Second conserved aspartate                                                                   |                                                            |                                                                                   |
| C410Y              | special, SH            | aromatic              | AD mutation                                                                                  | <b>C410Y</b>                                               | C410Y, C410F<br><a href="#">rs661</a>                                             |
| P433A              | special, imino<br>acid | hydrophobic           | Conserved proline (second <b>P</b> AL-motif)                                                 |                                                            |                                                                                   |
| P433L              | special, imino<br>acid | hydrophobic           | Conserved proline (second <b>P</b> AL-motif)                                                 | no                                                         | no                                                                                |
| P433Q              | special, imino<br>acid | <b>hydrophilic</b>    | Conserved proline (second <b>P</b> AL-motif)                                                 |                                                            |                                                                                   |
| L435D              | hydrophobic            | <b>hydrophilic</b>    | Conserved lysine<br>(second <b>P</b> AL-motif)                                               | L435F                                                      | L435F<br><a href="#">rs63750001</a>                                               |
| L435V              | hydrophobic            | hydrophobic           | Conserved lysine<br>(second <b>P</b> AL-motif)                                               |                                                            |                                                                                   |
| T440D              | hydrophobic            | <b>hydrophilic</b>    | Next to the second <b>P</b> AL-motif                                                         | T440del                                                    | no                                                                                |
| T440V              | hydrophobic            | hydrophobic           | Next to the second <b>P</b> AL-motif                                                         |                                                            |                                                                                   |



**Supplementary Table 2: List of mutated hIMP1 constructs.** Amino acid changes with similar physicochemical properties are in green boxes [1, 2]

| Construct hIMP1 | WT amino acid       | Mutated amino acid | Site position                                                                         | dbSNP 146 & COSMIC variants                                                                             |
|-----------------|---------------------|--------------------|---------------------------------------------------------------------------------------|---------------------------------------------------------------------------------------------------------|
| D219A           | <b>hydrophilic</b>  | hydrophobic        | First conserved aspartate                                                             | D219D <a href="#">rs149298851</a>                                                                       |
| D219E           | <b>hydrophilic</b>  | <b>hydrophilic</b> | First conserved aspartate                                                             |                                                                                                         |
| P239L           | special, imino acid | hydrophobic        | Partially conserved proline (next to the first conserved aspartate )                  | no                                                                                                      |
| P245L           | special, imino acid | hydrophobic        | Partially conserved proline (next to the first conserved aspartate )                  | P245S<br><a href="#">COSM3545056</a> ,<br><a href="#">COSM3545057</a>                                   |
| G262A           | special             | hydrophobic        | First conserved glycine within <b>G</b> xGD-motif of the second conserved aspartate   |                                                                                                         |
| G262K           | special             | <b>hydrophilic</b> | First conserved glycine within <b>G</b> xGD-motif of the second conserved aspartate   |                                                                                                         |
| G262L           | special             | hydrophobic        | First conserved glycine within <b>G</b> xGD-motif of the second conserved aspartate   | no                                                                                                      |
| G262Q           | special             | <b>hydrophilic</b> | First conserved glycine within <b>G</b> xGD-motif of the second conserved aspartate   |                                                                                                         |
| G262V           | special             | hydrophobic        | First conserved glycine within <b>G</b> xGD-motif of the second conserved aspartate   |                                                                                                         |
| G264A           | special             | hydrophobic        | Second conserved glycine within Gx <b>G</b> D-motif of the second conserved aspartate | no                                                                                                      |
| D265A           | <b>hydrophilic</b>  | hydrophobic        | Second conserved aspartate                                                            | D265D<br><a href="#">rs75266019</a> ,<br><a href="#">COSM5243623</a> ,<br><a href="#">COSM5243624</a> , |
| P317A           | special, imino acid | hydrophobic        | Conserved proline ( <b>P</b> AL-motif)                                                |                                                                                                         |
| P317L           | special, imino acid | hydrophobic        | Conserved proline ( <b>P</b> AL-motif)                                                | no                                                                                                      |
| P317Q           | special, imino acid | <b>hydrophilic</b> | Conserved proline ( <b>P</b> AL-motif)                                                |                                                                                                         |
| A318C           | hydrophobic         | special , SH       | Conserved alanine ( <b>P</b> <b>A</b> L-motif)                                        | no                                                                                                      |
| L319D           | hydrophobic         | <b>hydrophilic</b> | Conserved lysine ( <b>P</b> <b>A</b> <b>L</b> -motif)                                 | L319H<br><a href="#">COSM1025580</a> ,<br><a href="#">COSM1592518</a>                                   |
| L319V           | hydrophobic         | hydrophobic        | Conserved lysine ( <b>P</b> <b>A</b> <b>L</b> -motif)                                 |                                                                                                         |



**Supplementary Table 3: List of primers used for *C. elegans imp-2* cloning and transgenic/knockout strains genotyping**

| <i>C. elegans imp-2</i> |                                     |                 |
|-------------------------|-------------------------------------|-----------------|
| Genomic-RSC-dir         | TCTTTTGGAACTTAATCCAG                |                 |
| Genomic-RSC-rev         | AGTCTTGGTTTTGGTAGCTTGC              |                 |
| Genomic-RSC-dir2 (NotI) | TTTT-GCGGCCGC-AGCGAAAAACGAATTCGAAAG |                 |
| Genomic-RSC-rev2 (PstI) | TTTT-CTGCAG-AGTCTTGGTTTTGGTAGCTTG   |                 |
| DEL dir                 | GACAGCTCAGAACACGTGGA                |                 |
| DEL rev                 | TTCCGAAAACCCAGAAGATG                |                 |
| DEL rev TR              | CAGCTTTAGGCCAAAATTGA                |                 |
| <i>C. elegans imp-1</i> |                                     |                 |
| tm827delF               | TTGAAATTCGGTTCATCGT                 | WT - 535 bp     |
| tm827delR               | CTCCACAAGTCGGAAACCAT                | tm827 - 253 bp  |
| <i>C. elegans imp-3</i> |                                     |                 |
| tm1654delF              | GGTGGATAATACCTGGTGAA                | WT - 866 bp     |
| tm1654delR              | AAAGAAGCGCCAATATCGAA                | tm1654 - 146 bp |

## SUPPLEMENTARY TABLE REFERENCES

1. Frömmel C. The apolar surface area of amino acids and its empirical correlation with hydrophobic free energy. *J Theor Biol.* 1984; 111:247–60.
2. Livingstone CD, Barton GJ. Protein sequence alignments: a strategy for the hierarchical analysis of residue conservation. *Comput Appl Biosci.* 1993; 9:745–56.
